# Supplementary figures and images for: The mitochondrial genome sequence of the ciliate Paramecium caudatum reveals a shift in nucleotide composition and codon usage within the genus Paramecium
Source: Springer Nature journal article supplement (doi:10.1186/1471-2164-12-272), 2011-05-31

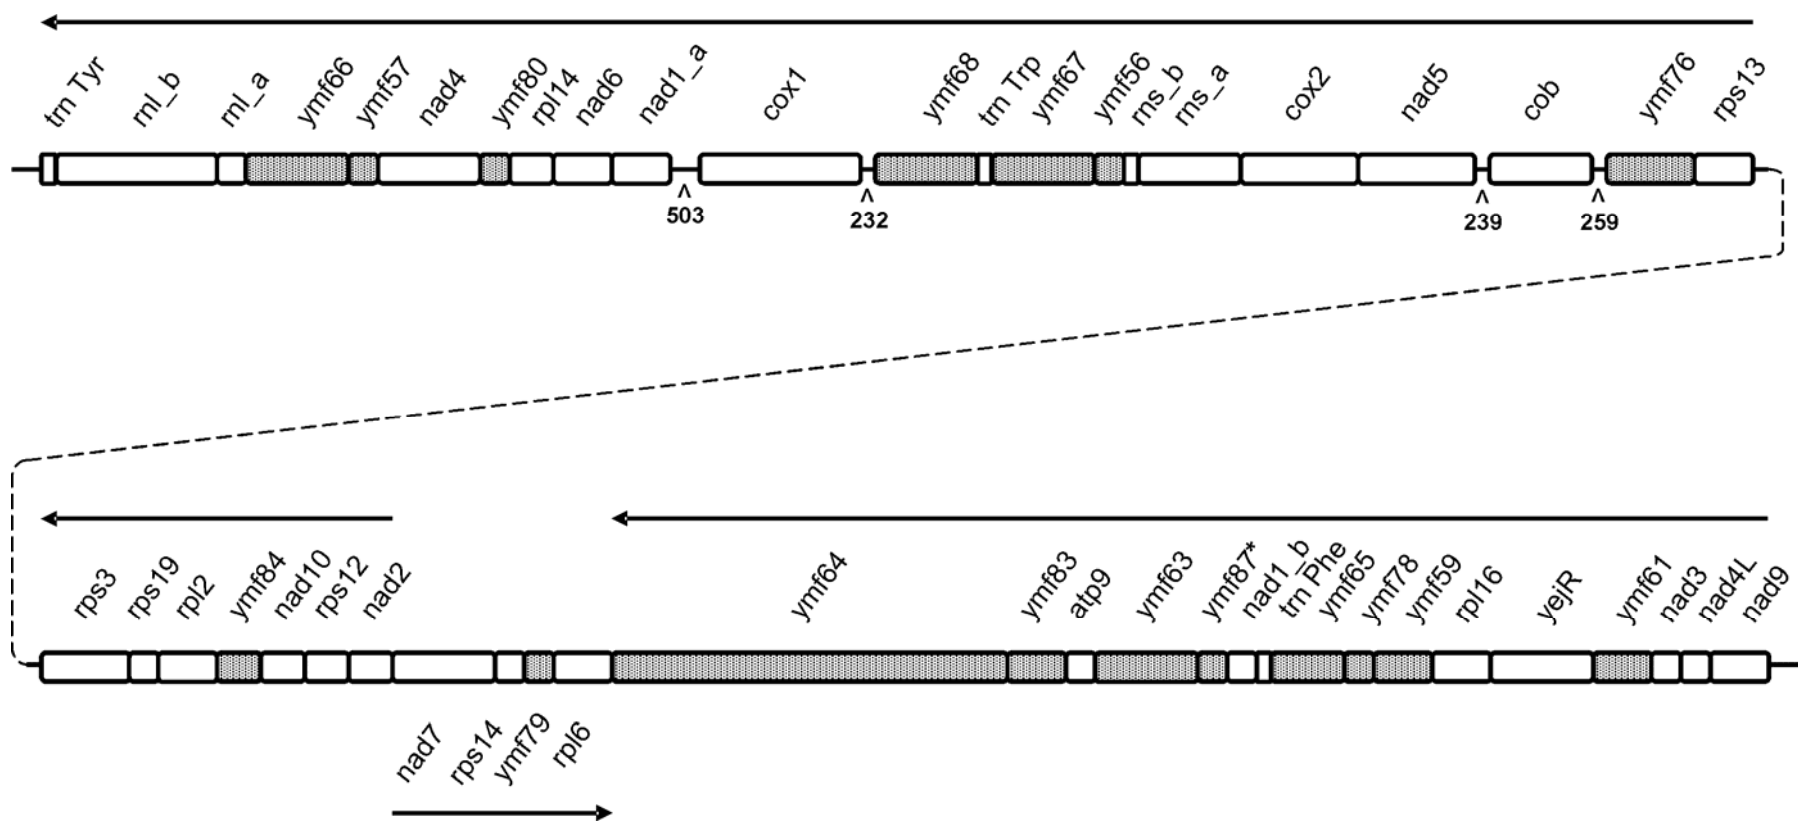

Supplement: 12864_2010_10156_MOESM3_ESM.pdf [file 12864_2010_10156_MOESM3_ESM.pdf]

**A**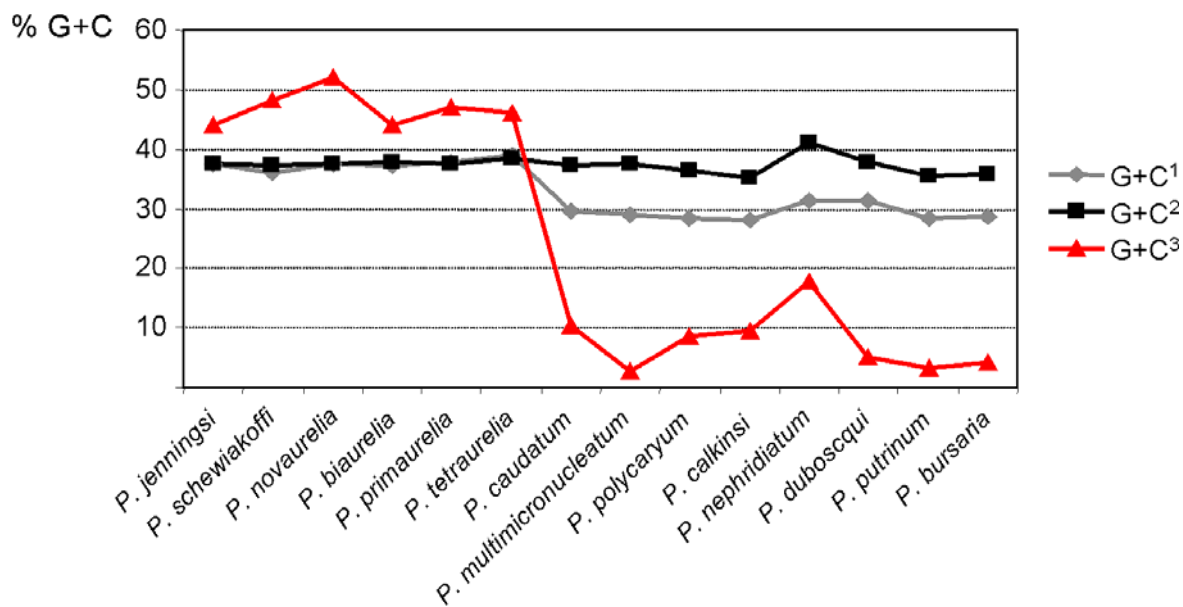**B**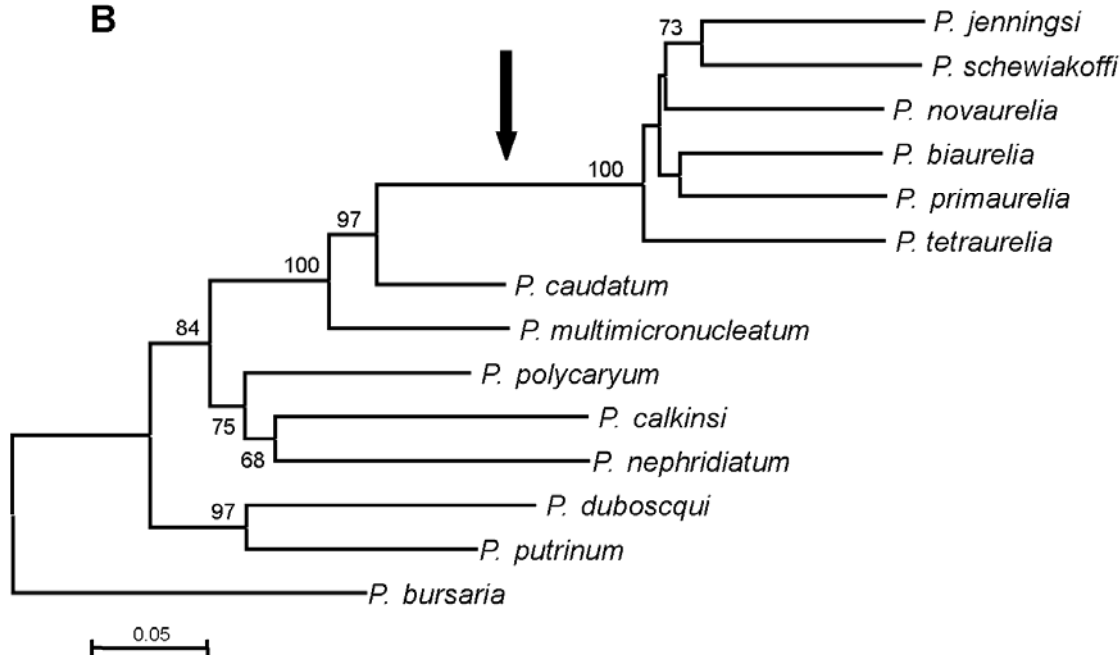

Supplement: 12864_2010_10156_MOESM4_ESM.pdf [file 12864_2010_10156_MOESM4_ESM.pdf]

1.58

1.38

0.95

0.83

0.56

M

a

b

c

d

e

f

g

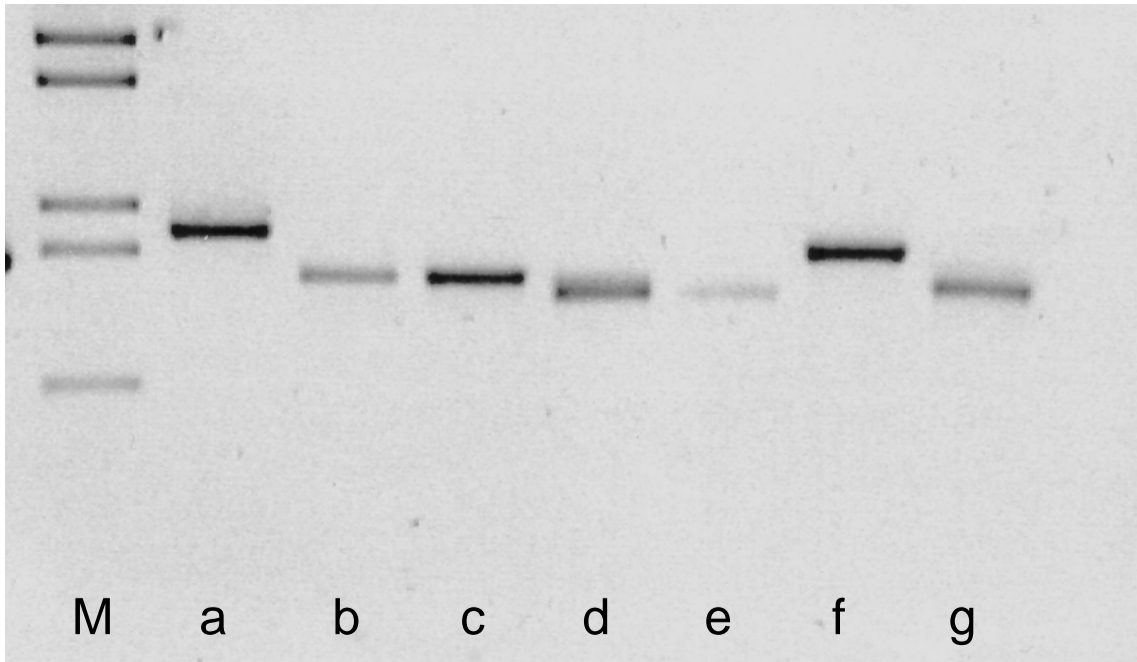

Supplement: 12864_2010_10156_MOESM5_ESM.pdf [file 12864_2010_10156_MOESM5_ESM.pdf]
